# Supplementary material for: Beta-Glucan as a Soluble Dietary Fiber Source: Origins, Biosynthesis, Extraction, Purification, Structural Characteristics, Bioavailability, Biofunctional Attributes, Industrial Utilization, and Global Trade
Source: MDPI journal article supplement (doi:10.3390/nu16060900), 2024-03-21
Supplement: s1 [file s1]

Supplementary Table S1. Genes involved in the synthesis of  $\beta$ -Glucan in yeast.

| Gene         | Source                           | Encoded protein                                        | References |
|--------------|----------------------------------|--------------------------------------------------------|------------|
| <i>cwg2+</i> | <i>Schizosaccharomyces pombe</i> | $\beta$ -subunit of a geranylgeranyltransferase type I | [131]      |
| <i>KRE6</i>  | <i>S. cerevisiae</i>             | Type II membrane protein                               | [132]      |
| PKC1         | <i>S. cerevisiae</i>             | Yeast homolog of the mammalian protein kinase C family | [133]      |
| <i>SKN1</i>  | <i>S. cerevisiae</i>             | Membrane protein                                       | [134]      |
| <i>LRG1</i>  | <i>S. cerevisiae</i>             | RhoGAP protein                                         | [135]      |

Supplementary Table S2. Different extraction methodologies developed and used to extract protein from the different sources of  $\beta$ -glucan.

| Source    | Extraction method              | Procedure                                                                        | Purification method                                                              | Reference |
|-----------|--------------------------------|----------------------------------------------------------------------------------|----------------------------------------------------------------------------------|-----------|
| Barley    | Aqueous extraction             | 100 g barley flour, 500 mL water                                                 | Centrifuge (10,000 rpm), 10 min, ethanol precipitate (95% ethanol)               | [136]     |
| Oats      | Alkaline extraction            | 100 g oat bran, 100 mL 1% NaOH, 400 mL water                                     | Centrifuge (10 min), ethanol precipitation (95% ethanol)                         | [137]     |
| Oats      | Enzymatic extraction           | 200 g oat bran, 20 mL $\beta$ -glucanase enzyme solution (10 U/mL), 480 mL water | Centrifugation at 10,000 rpm for 10 minutes, ethanol precipitation (95% ethanol) | [138]     |
| Barley    | Ultrasound-assisted extraction | Barley flour, 500 mL water                                                       | Centrifugation at 13,000 rpm for 10 minutes, ethanol precipitation (95% ethanol) | [139]     |
| Oats      | Microwave-assisted extraction  | 100 g oat bran, 500 mL water                                                     | Centrifugation at 10,000 rpm for 10 minutes, ethanol precipitation (95% ethanol) | [140]     |
| Mushrooms | Alkaline extraction            | 100 g mushrooms, 100 mL 1% sodium hydroxide solution, 400 mL water               | Centrifugation at 10,000 rpm for 10 minutes, ethanol precipitation (95% ethanol) | [141]     |
| Yeast     | Enzymatic extraction           | 100 g yeast, 10 mL $\beta$ -glucanase enzyme solution (10 U/mL), 490 mL water    | Centrifugation at 10,000 rpm for 10 minutes, ethanol precipitation (95% ethanol) | [142]     |

## References

1. Diaz, M.; Sanchez, Y.; Bennett, T.; Sun, C.R.; Godoy, C.; Tamanoi, F.; Duran, A.; Perez, P. The *Schizosaccharomyces pombe* *cwg2+* gene codes for the beta subunit of a geranylgeranyltransferase type I required for beta-glucan synthesis. *EMBO J.* **1993**, *12*, 5245–5254. <https://doi.org/10.1002/j.1460-2075.1993.tb06220.x>.
2. Roemer, T.; Bussey, H. Yeast beta-glucan synthesis: KRE6 encodes a predicted type II membrane protein required for glucan synthesis in vivo and for glucan synthase activity in vitro. *Proc. Natl. Acad. Sci. USA* **1991**, *88*, 11295–11299. <https://doi.org/10.1073/pnas.88.24.11295>.
3. Levin, D.E.; Bartlett-Heubusch, E. Mutants in the *S. cerevisiae* PKC1 gene display a cell cycle-specific osmotic stability defect. *J. Cell Biol.* **1992**, *116*, 1221–1229. <https://doi.org/10.1083/jcb.116.5.1221>.
4. Roemer, T.; GParavicini; Payton, M.A.; Bussey, H. Characterization of the yeast (1→6)-beta-glucan biosynthetic components, Kre6p and Skn1p, and genetic interactions between the PKC1 pathway and extracellular matrix assembly. *J. Cell Biol.* **1994**, *127*, 567–579. <https://doi.org/10.1083/jcb.127.2.567>.
5. Watanabe, D.; Abe, M.; Ohya, Y. Yeast Lrg1p acts as a specialized RhoGAP regulating 1, 3-β-glucan synthesis. *Yeast* **2001**, *18*, 943–951. <https://doi.org/10.1002/yea.742>.
6. Maheshwari, G.; Sowrirajan, S.; Joseph, B. Extraction and isolation of β-glucan from grain sources—A review. *J. Food Sci.* **2017**, *82*, 1535–1545. <https://doi.org/10.1111/1750-3841.13765>.
7. Wood, P.J. Relationships between solution properties of cereal β-glucans and physiological effects—a review. *Trends Food Sci. Technol.* **2004**, *15*, 313–320. <https://doi.org/10.1016/j.tifs.2003.03.001>.
8. McCleary, B.V.; Codd, R. Measurement of (1→3),(1→4)-β-D-glucan in barley and oats: A streamlined enzymic procedure. *J. Sci. Food Agric.* **1991**, *55*, 303–312. <https://doi.org/10.1002/jsfa.2740550215>.
9. Sourki, A.H.; Koocheki, A.; Elahi, M. Ultrasound-assisted extraction of β-d-glucan from hull-less barley: Assessment of physicochemical and functional properties. *Int. J. Biol. Macromol.* **2017**, *95*, 462–475. <https://doi.org/10.1016/j.ijbiomac.2016.10.111>.
10. Harasym, J.; Ołędzki, R. Comparison of conventional and microwave assisted heating on carbohydrate content, antioxidant capacity and postprandial glycemic response in oat meals. *Nutrients* **2018**, *10*, 207. <https://doi.org/10.3390/nu10020207>.
11. Chen, J.; Chen, L.; Lin, S.; Liu, C.; Cheung, P.C.K. Preparation and structural characterization of a partially depolymerized beta-glucan obtained from *Poria cocos* sclerotium by ultrasonic treatment. *Food Hydrocoll.* **2015**, *46*, 1–9. <https://doi.org/10.1016/j.foodhyd.2014.12.005>.
12. Yang, W.; Huang, G. Extraction methods and activities of natural glucans. *Trends Food Sci. Technol.* **2021**, *112*, 50–57. <https://doi.org/10.1016/j.tifs.2021.03.025>.
